# Supplementary material for: The ENDOPAIN 4D Questionnaire: A New Validated Tool for Assessing Pain in Endometriosis
Source: MDPI journal article supplement (doi:10.3390/jcm10153216), 2021-07-21
Supplement: s1 [file s1]

## Supplementary Materials

**Table S1.** Descriptive statistics and scoring distribution of the 20 items of the ENDOPAIN-4D questionnaire among endometriosis patients (Each item is scored on a scale from 0 [No pain] to 10 [Worst pain]).

| Item (condensed)                   | Min | Q1  | Median | Mean | Q3   | Max  | Missing data<br>N (%) | SD  | Skewness |
|------------------------------------|-----|-----|--------|------|------|------|-----------------------|-----|----------|
| <i>Dysmenorrhoea</i>               | 0.0 | 4.0 | 6.0    | 5.9  | 8.0  | 10.0 | 3(1.5)                | 2.5 | -0.74    |
| Non-menstrual pelvic pain          | 0.0 | 0.0 | 4.0    | 3.9  | 6.0  | 10.0 | 7(3.5)                | 2.9 | 0.00     |
| Intense pain                       | 0.0 | 6.0 | 8.0    | 6.9  | 10.0 | 10.0 | 4(2.0)                | 3.6 | -1.13    |
| Worsening pain                     | 0.0 | 0.0 | 8.0    | 6.0  | 9.0  | 10.0 | 6(3.0)                | 4.0 | -0.61    |
| Pain before period                 | 0.0 | 2.0 | 6.0    | 5.5  | 8.0  | 10.0 | 27(13.6)              | 3.6 | -0.43    |
| Stabbing pain                      | 0.0 | 4.0 | 8.0    | 6.2  | 9.0  | 10.0 | 10(5.0)               | 3.8 | -0.81    |
| Lower back pain                    | 0.0 | 0.0 | 7.0    | 5.4  | 9.0  | 10.0 | 6(3.0)                | 3.8 | -0.39    |
| Leg/hip pain                       | 0.0 | 0.0 | 2.0    | 3.6  | 8.0  | 10.0 | 5(2.5)                | 3.9 | 0.37     |
| Disabling pain                     | 0.0 | 3.0 | 6.0    | 5.3  | 8.0  | 10.0 | 2(1.0)                | 3.4 | -0.49    |
| Pain affects mobility              | 0.0 | 1.5 | 6.0    | 5.3  | 8.0  | 10.0 | 4(2.0)                | 3.6 | -0.41    |
| Dyspareunia                        | 0.0 | 0.0 | 4.0    | 3.8  | 7.0  | 10.0 | 26(13.1)              | 3.2 | 0.11     |
| Positional dyspareunia             | 0.0 | 3.0 | 6.0    | 5.6  | 8.0  | 10.0 | 26(13.1)              | 3.4 | -0.49    |
| Interruption of sexual intercourse | 0.0 | 0.0 | 6.0    | 4.7  | 8.0  | 10.0 | 23(11.6)              | 4.0 | -0.09    |
| Painful bowel movements            | 0.0 | 0.0 | 4.0    | 3.8  | 7.0  | 10.0 | 5(2.5)                | 3.3 | 0.11     |
| Bowel spasms                       | 0.0 | 0.0 | 5.0    | 4.1  | 7.0  | 10.0 | 9(4.5)                | 3.1 | -0.10    |
| Diarrhoea/constipation             | 0.0 | 0.0 | 4.0    | 4.0  | 7.0  | 10.0 | 6(3.0)                | 3.1 | -0.08    |
| Pain when urinating                | 0.0 | 0.0 | 0.0    | 1.7  | 3.0  | 10.0 | 6(3.0)                | 2.7 | 1.41     |
| Bladder pain                       | 0.0 | 0.0 | 0.0    | 2.4  | 5.0  | 10.0 | 6(3.0)                | 2.9 | 0.73     |
| Sciatica                           | 0.0 | 0.0 | 0.0    | 1.9  | 4.0  | 10.0 | 8(4.0)                | 2.8 | 1.10     |
| Right shoulder pain                | 0.0 | 0.0 | 0.0    | 2.7  | 7.0  | 10.0 | 8(4.0)                | 3.7 | 1.85     |

Min: minimum; Q1: 1st quartile; Q3: 3rd quartile; Max: maximum; SD: standard deviation.

**Table S2.** Construct validity: Pearson correlation of the four subscores and the ENDOPAIN-4D total score with other patient-reported outcome instruments used for endometriosis patients.

|                           | Pain-related<br>disability | Painful bowel<br>symptoms | Dyspareunia | Painful urinary<br>tract symptoms | ENDO-<br>PAIN-4D<br>total score |
|---------------------------|----------------------------|---------------------------|-------------|-----------------------------------|---------------------------------|
| SAQ                       | -0.21*                     | -0.17*                    | -0.48***    | -0.13                             | -0.38***                        |
| EHP-5                     | 0.66***                    | 0.50**                    | 0.60***     | 0.41**                            | 0.75***                         |
| EQ5D-3L                   | -0.43***                   | -0.25***                  | -0.28***    | -0.22**                           | -0.40***                        |
| EQ5D-<br>VAS              | -0.37***                   | -0.16*                    | -0.29***    | -0.23**                           | -0.40***                        |
| KESS                      | 0.22**                     | 0.54***                   | 0.22*       | 0.17*                             | 0.41***                         |
| IPSS                      | 0.24**                     | 0.29***                   | 0.33***     | 0.60***                           | 0.49***                         |
| Worst<br>case pain<br>NRS | 0.48***                    | 0.42***                   | 0.39***     | 0.28***                           | 0.57***                         |

\* $<0.05$  \*\* $<0.01$  \*\*\* $<0.001$ , SAQ: Sexual activity questionnaire; EHP-5: Endometriosis Health Profile 5; EQ5D 3L: EuroQoL 5D-3L; EQ5D VAS: EuroQoL Visual Analogue Scale, KESS: Knowles-Eccersley-Scott Symptoms Questionnaire; IPSS: International Prostate Symptom Score, NRS: Numerical Rating Scale.
